# Supplementary material for: Pre-treatment with sumatriptan for cilostazol induced headache in healthy volunteers
Source: J Headache Pain. 2018 Aug 17;19(1):71. doi: 10.1186/s10194-018-0890-y (PMC6097976; doi:10.1186/s10194-018-0890-y)
Supplement: Supplementary file 1 — Datasheet pre-treatment. (XLSX 18 kb) [file 10194_2018_890_MOESM1_ESM.xlsx]

## Sheet: Ark1
PLACEBO
Placebo/Active	Time for Suma1	Time for cilo+suma2	Headachescoree 0,5t=30	1t=60	1,5t=90	2t=120	2,5t=150	3t=180	3,5t=210	4t=240	4,5t=270	5t=300	5,5t=330	6t=360	7t=420	8t=480	9t=540	10t=600	11t=660	12t=720	Peak Headache	Localisation	Character	Aggravation	Nausea/vomitting	Photophobic	Phonophobic	Migraine attack	Time for IHS (h)	Other things	Rescue medication	Time	Medication	Predisposed	Sex
P	9.00	10.30	1	1	1	1	1	1	0	0	0	0	0	0	0	0	0	0	0	0	1	0	0/1	0	0	0	0	0		Træt, hjertebanken	0			Nej	F
P	8.45	10.15	1	1	1	1	1	0	0	1	2	1	1	1	1	0	0	0	0	0	2	0	0	0/1	0	0	0	0			0			Nej	M
P	10.00	11.30	0	0	0	0	0	0	0	0	0	0	0	0	0	0	0	0	0	0	0	0	0	0	0	0	0	0			0			Nej	F
P	8.45	10.15	0	0	1	1	1	0	2	3	3	3	2	1	0	1	1	1	4	2	4	0/1	0/1	0	0	0	0	0			0			Nej	F
P	9.45	11.15	1	0	1	1	2	2	0	0	0	0	0	0	0	0	0	0	0	0	2	0/1	0	0/1	0	0	0	0		Varmefornemmelse	0			Nej	M
P	9.15	10.45	1	1	1	1	1	1	2	2	3	3	3	3	4	4	3	2	1	1	4	0	0/1	0/1	0	0	0	0		Træt	0			Nej	F
P	9.30	11.00	0	0	0	0	0	0	0	0	0	0	0	0	0	0	0	0	0	0	0	0	0	0	0	0	0	0		Lidt hovedpine kl 2 om natten	0			Nej	M
P	10.15	11.45	1	1	1	1	1	1	1	1	1	1	1	3	5	5	6	6	7		7	0	0	0/1	0	1	0	0			1	11h	Panodil+ipren	Ja	M
P	10.00	11.30	0	0	0	0	0	0	0	0	0	0	0	2	2	1	1	1	0	0	2	1	0	0	0	0	0	0			0			Nej	F
P	9.15	10.45	0	0	0	0	0	0	1	1	1	1	1	1	1	1	2	2	2	3	3	0	0	1	0	0	0	0			0			Nej	M
P	8.30	10.00	0	0	0	0	1	1	0	1	2	1	0	0	0	0	0	0	0	0	1	0	0	0	0	0	0	0			0			Nej	F
P	9.00	10.30	1	1	1	1	2	3	2	1	1	2	2	3	2	2	1	1	1	1	3	0	0/1	0/1	0	0	0	0			0			Nej	M
P	10.05	11.35	0	0	2	4	4	3	3	3	3	4	3	3	2	0	0	0	0	0	4	0	0/1	1	0	0	0/1	0			0			Nej	M
P	8.30	10.00	1	1	1	2	2	1	1	1	1	1	1	2	1	1	1	1	1	1	2	0	0	0	0/1	1	0	0			0			Nej	F
P	9.15	10.45	0	1	2	2	2	3	3	3	3	3	3	2	3	2	2	0	0	0	3	0	0/1	1	0	0/1	0	0		Varmefornemmelse	0			Nej	F
P	11.40	13.10	0	0	1	1	1	1	1	1	1	1	1	1	1	0	0	1	1	1	1	0	0/1	0/1	0	0	0/1	0			0			Nej	F
P	10.00	11.30	0	0	0	0	0	0	0	0	0	0	0	1	1	1	2	3	4		4	0	0/1	1	Opkast	0	0	0			0			Nej	F
P	7.30	9.00	0	0	0	0	0	0	0	0	0	0	0	0	0	0	0	0	0	0	0	0	0	0	0	0	0	0			0			Nej	M
P	9.30	11.00	0	1	1	1	2	2	2	2	2	1	1	1	1	1	1	0	0	0	2	0	1	0	0	0	0	0			0			Nej	M
P	10.00	11.30	0	0	0	0	0	2	0	1	3	3	1	3	5	5	3	1	1	1	5	0	1	1	0	0	0	0			0			Nej	M
P	9.00	10.30	0	0	0	0	0	0	0	0	0	0	0	1	1	0	0	0	0	0	1	0	0	1	0	0	0	0			0			Nej	M
P	10.15	11.45	0	1	1	1	1	1	2	2	2	2	2	1	1	1	1	1	1	2	2	0	0	0	0	0/1	0	0			0			Ja	M
P	8.30	10.00	1	1	1	1	2	1	3	4	4	2	6	5	6	3	7	3	3	2	7	0/1	0/1	0/1	Opkast	0	0	1	5,5h	Svimmel	0			Nej	F
P	9.05	10.35	1	1	2	3	0	2	0	0	0	0	1	2	3	0	1	5	2	1	5	0/1	0/1	0/1	0/1	0	0	0		Trykken for brystet, svimmel	0			Nej	F
P	9.30	11.00	0	0	0	0	1	1	1	1	1	1	2	2	1	1	1	1	1	1	2	0	0/1	0	0/1	0	0	0		Svimmel, træt, ondt i maven	0			Ja	F
P	10.30	12.00	0	0	0	0	0	1	1	1	2	2	2	1	1	1	1	0	0	0	2	1	0	0	0	0	0	0			0			Nej	M
P	9.45	11.15	0	0	0	0	0	0	1	1	0	0	0	0	0	0	1	0	0	0	1	1	1	1	0	0	0	0			0			Måske	F
P	9.00	10.30	2	1	0	0	0	0	0	0	0	0	0	0	0	0	0	0	0	0	2	0	0	0	0	0	0	0			0			Nej	M
P	9.10	10.40	0	0	1	2	2	2	1	2	3	3	3	2	6	7	8	2	1	1	8	0	1	0/1	0/1	0/1	0	1	7h	Træt, forpustet, hjertebanken	1	9h	Pamol+ibuprofen	Nej	F
P	9.15	10.45	0	2	2	2	2	3	3	3	3	3	3	3	3	2	2	2	x	x	3	1	0	0/1	0	0	0	0		Luft i maven	0			Nej	M
																						8	15	17	6**	5	2	2
																					27 reported headache (0-7)
Sumatriptan																					Median peak 2
Placebo/Active	Time for Suma1	Time for cilo+suma2	Headachescoree 0,5t=30	1t=60	1,5t=90	2t=120	2,5t=150	3t=180	3,5t=210	4t=240	4,5t=270	5t=300	5,5t=330	6t=360	7t=420	8t=480	9t=540	10t=600	11t=660	12t=720	Peak Headache	Localisation	Character	Aggravation	Nausea/vomitting	Photophobic	Phonophobic	Migraine attack	Time for IHS (h)	Other things	Rescue medication	Time	Medication	Predisposed	Sex
A	8.30	10.00	1	2	3	3	3	2	2	2	1	1	1	0	0	0	0	0	0	0	3	0/1	0	0/1	0/1	0	0	0		Hjertebanken, hyppig toilet	0			Nej	F
A	8.30	10.00	1	1	0	0	0	0	0	0	0	0	0	0	0	0	0	0	0	0	1	0	0	0	0	0	0	0			0			Nej	M
A	10.45	12.15	0	1	1	1	1	1	1	1	1	1	1	1	1	1	1	1	1	0	1	0	0	1	0	0	0	0		Grim smag i munden	0			Nej	F
A	8.30	10.00	0	0	0	0	0	1	0	1	1	2	1	1	1	1	1	2	1	1	2	0/1	0/1	0/1	0/1	0	0	0		Snurren i ben, kvalme inden cilo	0			Nej	F
A	8.45	10.15	3	1	1	2	2	3	2	0	3	1	0	0	1	1	2	2	1	1	3	0	0	0	0	0	0/1	0			0			Nej	M
A	8.15	9.45	0	0	1	1	1	1	1	1	1	1	1	0	0	0	0	0	0	0	1	0	0	0	0	0	0	0			0			Nej	F
A	9.00	10.30	0	0	0	0	0	0	0	0	0	0	0	0	0	0	0	0	0	0	0	0	0	0	0	0	0	0			0			Nej	M
A	9.30	11.00	2	2	1	1	1	1	1	1	1	0	0	1	3	3	3	5	5	4	5	0	0/1	0/1	0	0/1	0/1	1	10h		0			Ja	M
A	10.30	12.00	0	0	1	0	0	0	0	0	1	0	0	0	0	0	0	0	0	0	1	0/1	0/1	0/1	0	0	0	0		Hjertebanken	0			Nej	F
A	9.15	10.45	0	0	0	0	0	0	0	0	1	1	1	2	2	3	3	4	4	4	4	0	1	1	0	0	0	0			0			Nej	M
A	10.30	12.00	1	1	1	2	2	2	2	2	3	3	3	5	4	2	1	0	0	0	5	0/1	0/1	0/1	0	0	0	0			0			Nej	F
A	11.15	12.45	1	1	1	2	2	2	2	3	3	2	2	1	1	1	1	1	1	1	3	0	0/1	0	0	0/1	0	0			0			Nej	M
A	10.15	11.45	0	1	0	0	0	0	0	0	0	0	0	3	1	0	0	0	0	0	3	0	0	1	0/1	0	0	0			0			Nej	M
A	8.30	10.00	0	0	0	0	0	0	0	0	0	0	1	1	1	1	1	1	1	1	1	0	0	0	0/1	0	0	0			0			Nej	F
A	8.45	10.15	0	0	0	0	0	0	0	0	0	0	0	0	0	1	0	0	0	0	1	0	0	0	0	0	0	0			0			Nej	F
A	9.00	10.30	0	1	1	1	1	1	2	2	3	3	3	4	4	4	3	3	3	3	4	0/1	0/1	0/1	0	0	0/1	0			0			Nej	F
A	8.30	10.00	0	0	0	0	0	0	0	0	0	0	0	0	0	1	1	1	1	0	1	1	1	1	0	1	0	0			0			Nej	F
A	9.30	11.00	0	0	0	0	0	0	0	0	0	0	0	0	0	0	0	0	0	0	0	0	0	0	0	0	0	0			0			Nej	M
A	9.15	10.45	0	1	1	2	2	2	3	3	2	2	2	1	1	1	1	1	0	0	3	0	1	0/1	0	0	0	0			0			Nej	M
A	10.30	12.00	0	0	1	1	1	0	0	0	3	3	1	1	3	2	2	5	5	2	5	0/1	0/1	0/1	0	0	0	0			0			Nej	M
A	9.30	11.00	1	1	2	3	3	2	2	1	2	3	2	2	2	3	2	2	1	1	3	0	0	0/1	0	0/1	0/1	0		Mundtørhed, jernsmag	0			Nej	M
A	08.35	10.05	0	0	0	0	1	1	1	1	1	1	2	2	3	3	4	3	2	1	4	0/1	0/1	0	0	0/1	0	0			0			Ja	M
A	9.15	10.45	0	0	0	0	0	0	0	0	0	0	0	1	0	0	0	0	0	0	1	1	1	0	0	0	0	0			0			Nej	F
A	9.45	11.15	0	0	0	0	0	0	0	0	0	0	0	0	1	0	0	0	0	0	1	0	0	0	0	0	0	0			0			Nej	F
A	9.00	10.30	0	0	0	0	1	1	1	1	0	0	0	0	0	0	0	0	0	0	1	0	0	0	0	0	0	0			0			Ja	F
A	10.00	11.30	0	1	1	1	1	0	0	0	0	0	0	0	0	0	0	0	0	0	1	0	0	0	0	0	0	0			0			Nej	M
A	12.00	10.30	1	1	0	0	0	1	1	1	1	1	1	1	0	1	1	0	1	0	1	0	0	0/1	0/1	0/1	0	0		Træt, tung i hovedet	0			Måske	F
A	9.30	11.00	3	4	3	2	1	0	0	0	0	0	0	0	0	0	0	0	0	0	4	0	0	0	0/1	0/1	0	0		Ømme kæber	0			Nej	M
A	9.00	10.30	0	0	0	0	0	0	0	0	0	0	0	0	1	1	1	2	3	2	3	0/1	1	1	0/1	0	0	1	7h	Svimmel, hjertebanken	0			Nej	F
A	8.50	10.20	0	0	0	0	0	0	0	0	0	0	0	0	0	0	0	0	0	0	0	0	0	0	0	0	0	0		Usammenhængende aff.	0			Nej	M
																						10	13	15	7	7	4	2
																					27 reported headache (0-5)
																					Median peak 1.5
